# Supplementary material
Source: PubMed Central journal article supplement (PMC5543393)
Supplement: bi7b00153_si_001.pdf [file bi7b00153_si_001.pdf]

# Identification of Two Secondary Ligand Binding Sites in 14-3-3 Proteins Using Fragment Screening

Eline Sijbesma<sup>1,#</sup>, Lukasz Skora<sup>2#</sup>, Seppe Leysen<sup>1</sup>, Luc Brunsveld<sup>1</sup>, Uwe Koch<sup>3</sup>, Peter Nussbaumer<sup>3</sup>, Wolfgang Jahnke<sup>2,\*</sup>, Christian Ottmann<sup>1,4\*</sup>

1 Department of Biomedical Engineering, Laboratory of Chemical Biology and Institute for Complex Molecular Systems, Eindhoven University of Technology, P.O. Box 513, 5600 MB, Eindhoven, The Netherlands.

2 Center for Proteomic Chemistry, Novartis Institutes for Biomedical Research, 4002 Basel, Switzerland

3 Lead Discovery Center GmbH, Otto-Hahn-Straße 15, 44227 Dortmund, Germany

4 Department of Chemistry, University of Duisburg-Essen, Essen, Germany

# contributed equally

\* corresponding authors: [wolfgang.jahnke@novartis.com](mailto:wolfgang.jahnke@novartis.com); [c.ottmann@tue.nl](mailto:c.ottmann@tue.nl)

## Supporting Information

**Table S1:** Crystallographic data

|                                           | 14-3-3σΔc/<br>TAZpS89     | 14-3-3σΔc/<br>TAZpS89/NV1  | 14-3-3σΔc/<br>TAZpS89/NV2  | 14-3-3σΔc/<br>TAZpS89/NV3 |
|-------------------------------------------|---------------------------|----------------------------|----------------------------|---------------------------|
| PDB ID                                    | 5N75                      | 5N5R                       | 5N5T                       | 5N5W                      |
| <b>Data collection</b>                    |                           |                            |                            |                           |
| Wavelength (Å)                            | 1.54                      | 1.54                       | 1.54                       | 1.033                     |
| Resolution (Å)                            | 45.60-1.80<br>(1.84-1.80) | 45.48-1.80 (1.84-<br>1.80) | 65.96-1.80 (1.84-<br>1.80) | 65.85-1.04 (1.39-1.37)    |
| Space group                               | C2221                     | C2221                      | C2221                      | C2221                     |
| Unit cell                                 | 82.18 112.27<br>62.82     | 81.96 111.97 62.63         | 81.51 112.27 62.59         | 81.29 112.29 62.51        |
| Total reflections <sup>a</sup>            | 167641 (6454)             | 168053 (6575)              | 167853 (6842)              | 788177 (38101)            |
| Unique reflections <sup>a</sup>           | 27105 (1500)              | 26488 (1393)               | 26972 (1563)               | 60317 (2923)              |
| Redundancy <sup>a</sup>                   | 6.2 (4.3)                 | 6.3 (4.7)                  | 6.2 (4.4)                  | 13.1 (13.0)               |
| Completeness (%) <sup>a</sup>             | 99.6 (94.5)               | 98.1 (87.1)                | 99.8 (98.2)                | 100.0 (100.0)             |
| Average I/σ(I) <sup>a</sup>               | 33.3 (9.7)                | 38.9 (8.8)                 | 42.1 (11.0)                | 20.7 (2.1)                |
| Wilson B-factor                           | 8.7                       | 6.7                        | 8.3                        | 13.6                      |
| CC <sub>1/2</sub> <sup>a,b</sup>          | 0.999 (0.989)             | 1.0 (0.98)                 | 1.0 (0.987)                | 1.0 (0.756)               |
| R <sub>sym</sub> <sup>a,c</sup>           | 0.039 (0.120)             | 0.040 (0.169)              | 0.034 (0.129)              | 0.072 (1.348)             |
| R <sub>meas</sub> <sup>a,d</sup>          | 0.043 (0.136)             | 0.043 (0.190)              | 0.037 (0.146)              | 0.075 (1.403)             |
| <b>Refinement</b>                         |                           |                            |                            |                           |
| Reflections<br>(refinement)               | 27083                     | 26475                      | 26951                      | 60289                     |
| Reflections (R-free)                      | 1429                      | 1308                       | 1325                       | 3044                      |
| Non-hydrogen atoms<br>(protein / solvent) | 2055 / 257                | 2025 / 274                 | 2029 / 248                 | 2001 / 214                |
| R <sub>work</sub> (%)                     | 15.3                      | 14.9                       | 15.9                       | 14.4                      |
| R <sub>free</sub> (%)                     | 18.6                      | 18.2                       | 18.4                       | 16.5                      |
| RMS (bonds) /<br>(angles)                 | 0.005 / 0.707             | 0.012 / 0.916              | 0.004 / 0.587              | 0.006 / 0.859             |
| Average protein B-<br>factor              | 11.93                     | 11.68                      | 12.35                      | 14.22                     |
| Ramachandran:<br>favored / outliers (%)   | 98.3 / 0.0                | 97.4 / 0.45                | 98.7 / 0.0                 | 98.3 / 0.0                |
| Clashscore                                | 0.73                      | 0.99                       | 1.46                       | 1.25                      |

<sup>a</sup> Number in parentheses is for the highest resolution shell used in the refinement

<sup>b</sup> CC<sub>1/2</sub> = Pearson's intra-dataset correlation coefficient, as described by Karplus and Diederichs

<sup>c</sup>  $R_{\text{sym}} = \sum_h \sum_l |I_{hl} - \langle I_h \rangle| / \sum_h \sum_l \langle I_h \rangle$ , where  $I_{hl}$  is the intensity of the  $l^{\text{th}}$  observation of reflection  $h$  and  $\langle I_h \rangle$

is the average intensity of reflection  $h$

<sup>d</sup>  $R_{\text{meas}} = \sum_h \sqrt{(n_h/(n_h-1)) \sum_l |I_{hl} - \langle I_h \rangle|} / \sum_h \sum_l \langle I_h \rangle$ , where  $n_h$  is the number of observations of reflection  $h$

<sup>e</sup> Correlation of experimental intensities with intensities calculated from refined model, as described by Karplus and Diederichs

Karplus, P. A. & Diederichs, K. (2012). Linking crystallographic model and data quality. *Science* **336**, 1030-3.

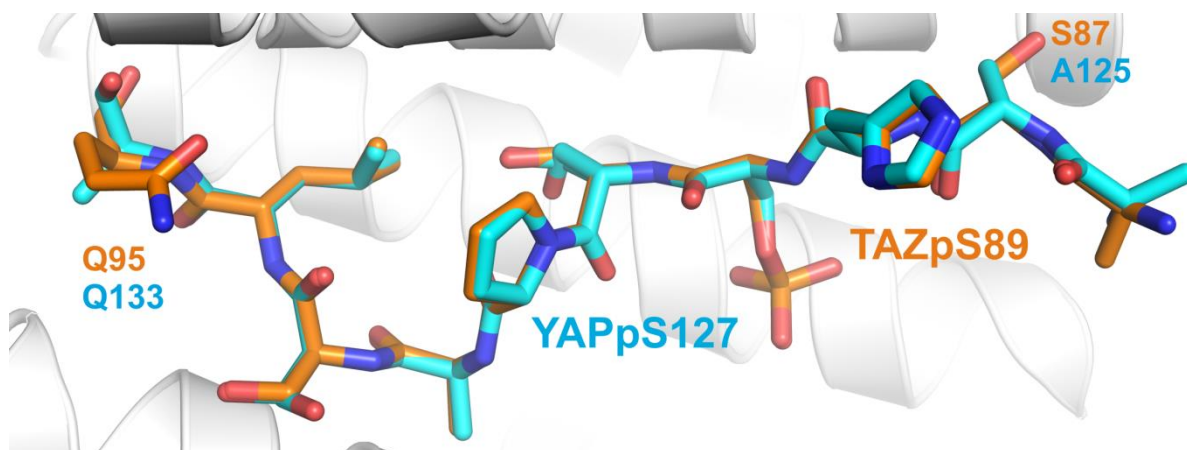

**Figure S1. Overlay of YAP and TAZ peptide in complex with 14-3-3.** Crystal structure of 14-3-3 $\sigma$  (grey, cartoon) bound to YAPpS127 (cyan sticks) and TAZpS89 (orange sticks). The only sequence difference is located at the -2 position relative to the phosphoserine (YAP: A125, TAZ: S87). (PDB IDs: 3MHR, 5N75)

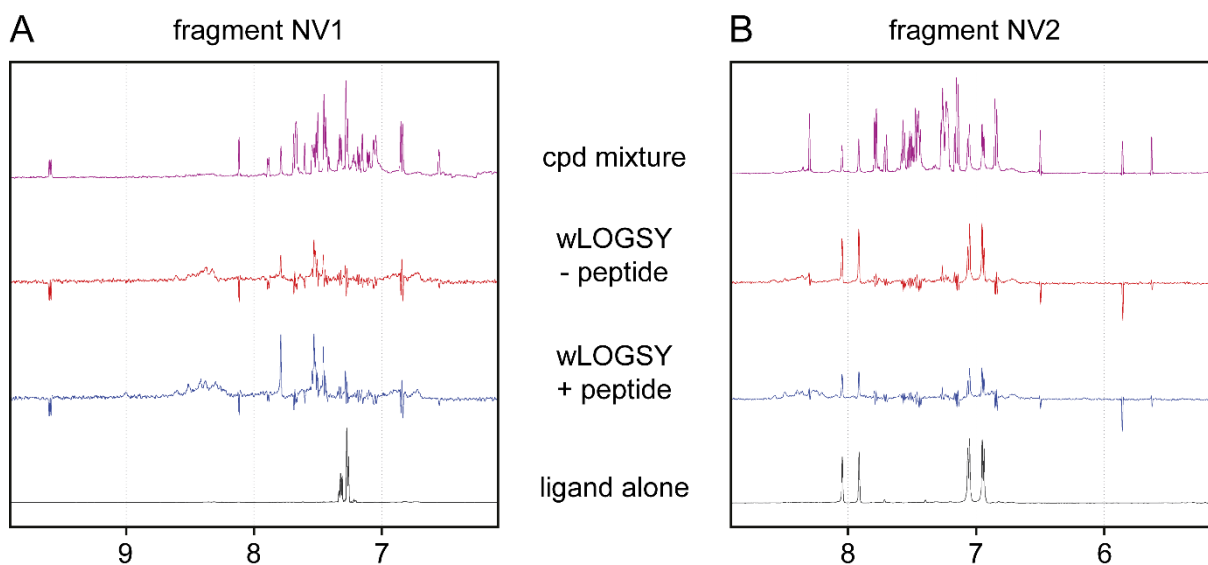

**Figure S2. Binding of fragments NV1 (A) and NV2 (B) to 14-3-3 in presence and absence of TAZpS89 peptide.** 1D  $^1\text{H}$  spectra of compound mixtures are shown in magenta. Binding of fragments to 14-3-3 is evidenced by wLOGSY spectra recorded in absence (red) and presence (blue) of TAZpS89 peptide. 1D  $^1\text{H}$  spectra of identified ligands are shown in black.

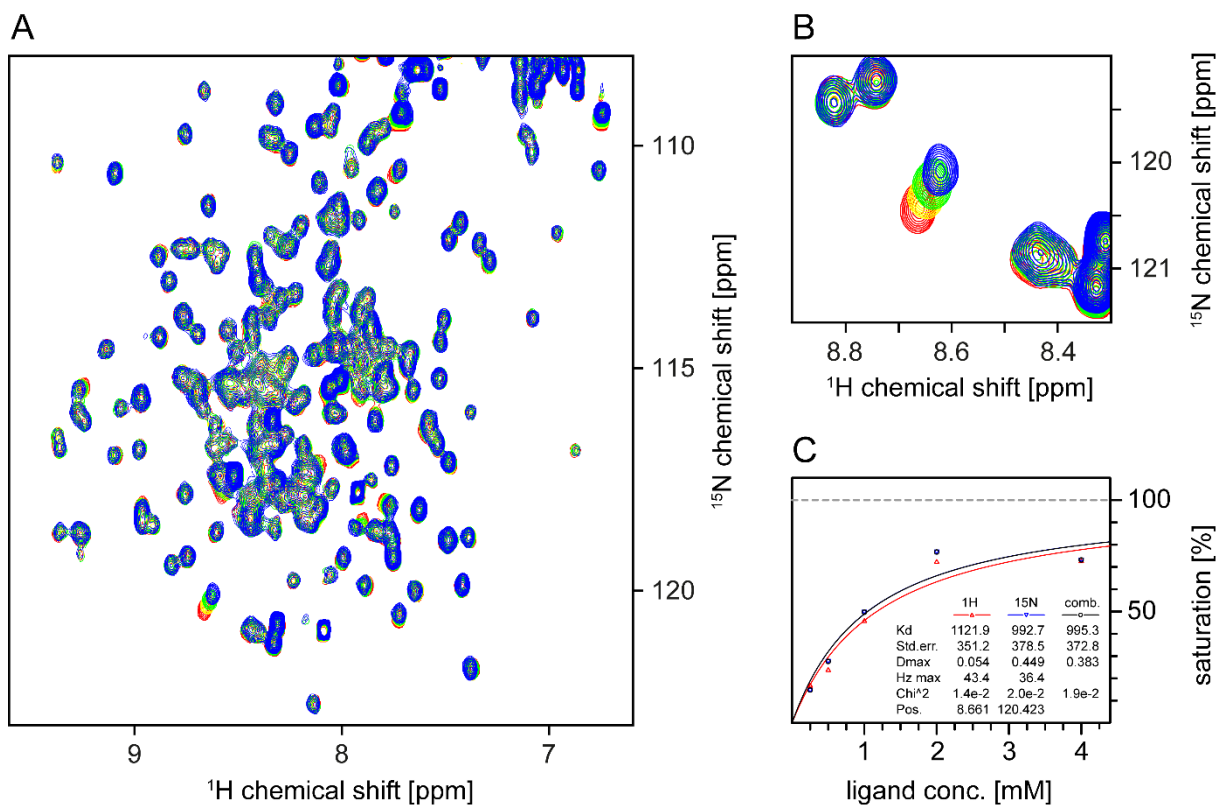

**Figure S3. Determination of binding affinity of fragment NV2 to the 14-3-3 / TAZpS89 complex.** (A) fragment NV2 was titrated to a preformed complex of 100 mM 14-3-3 and 150 mM TAZpS89 (red) in 5 steps: 250  $\mu$ M (not shown), 500  $\mu$ M (yellow), 1 mM (green), 2 mM (blue), 4 mM (not shown). (B) Excerpt of spectrum A showing the resonance with largest chemical shift perturbations. (C) Fitting of data indicates a  $\sim$ 1 mM affinity.

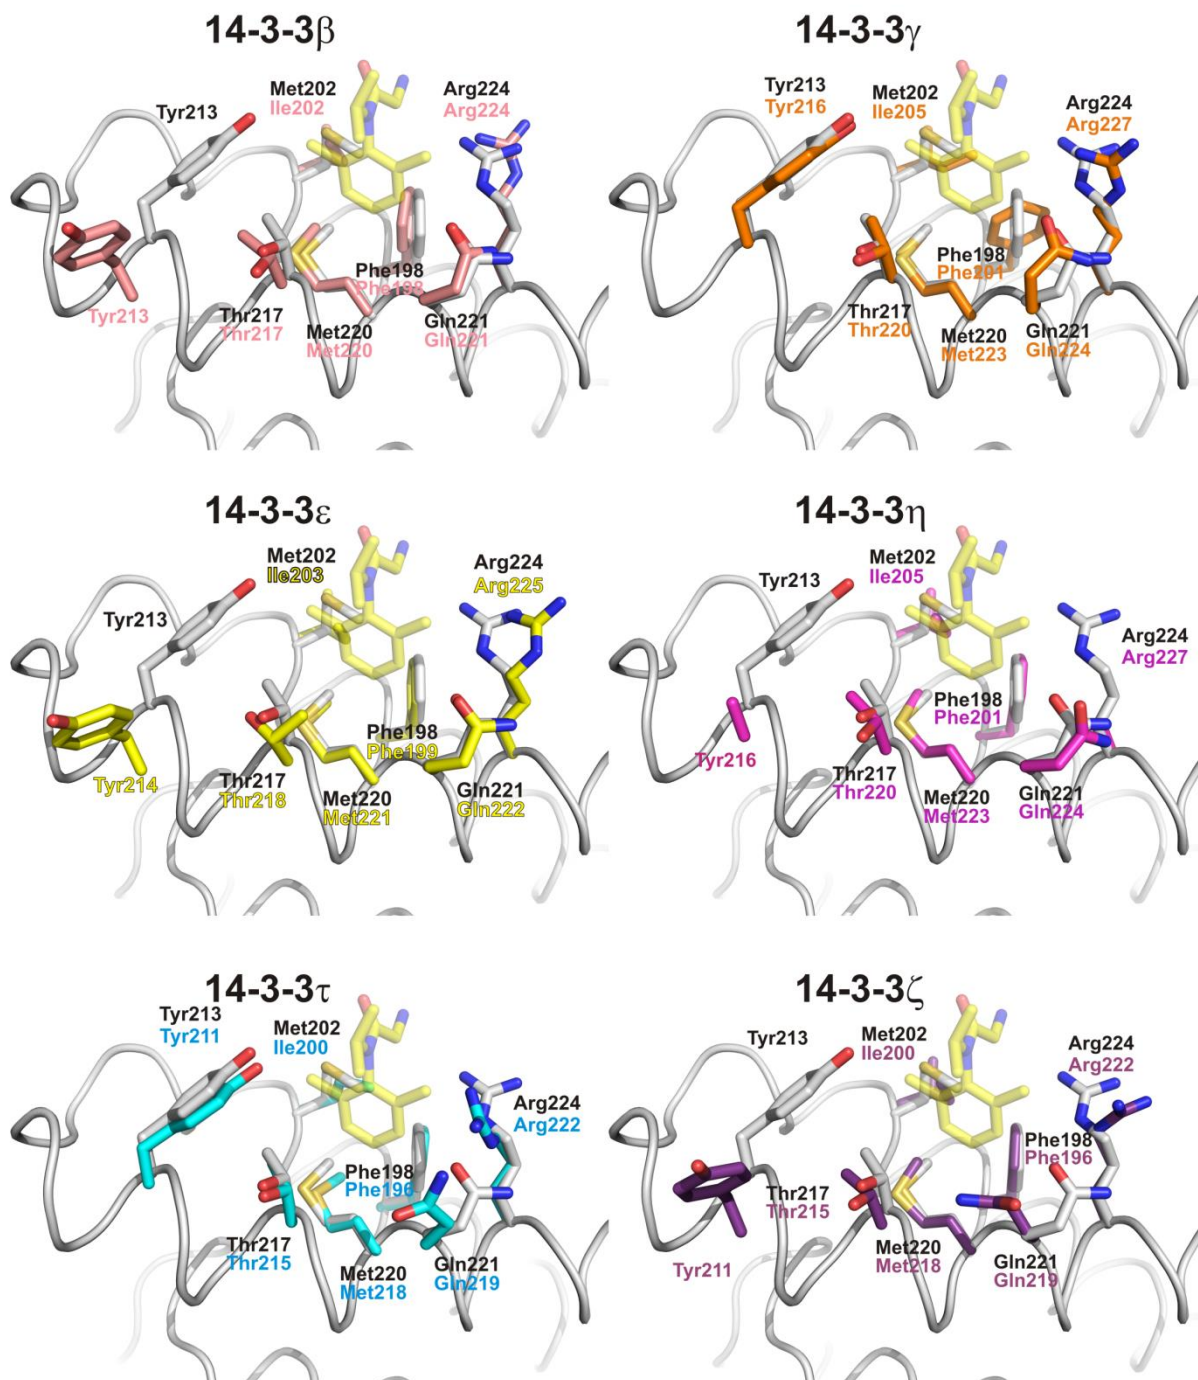

**Figure S4. Structural alignments of the NV1 binding pocket among the seven human 14-3-3 isoforms.** Structures with the following PDB IDs were used for the depicted alignments: 14-3-3 $\beta$  (4GNT), 14-3-3 $\gamma$  (4J6S), 14-3-3 $\epsilon$  (3UBW), 14-3-3 $\eta$  (2C74), 14-3-3 $\tau$  (2BTP), 14-3-3 $\zeta$  (4WRQ).

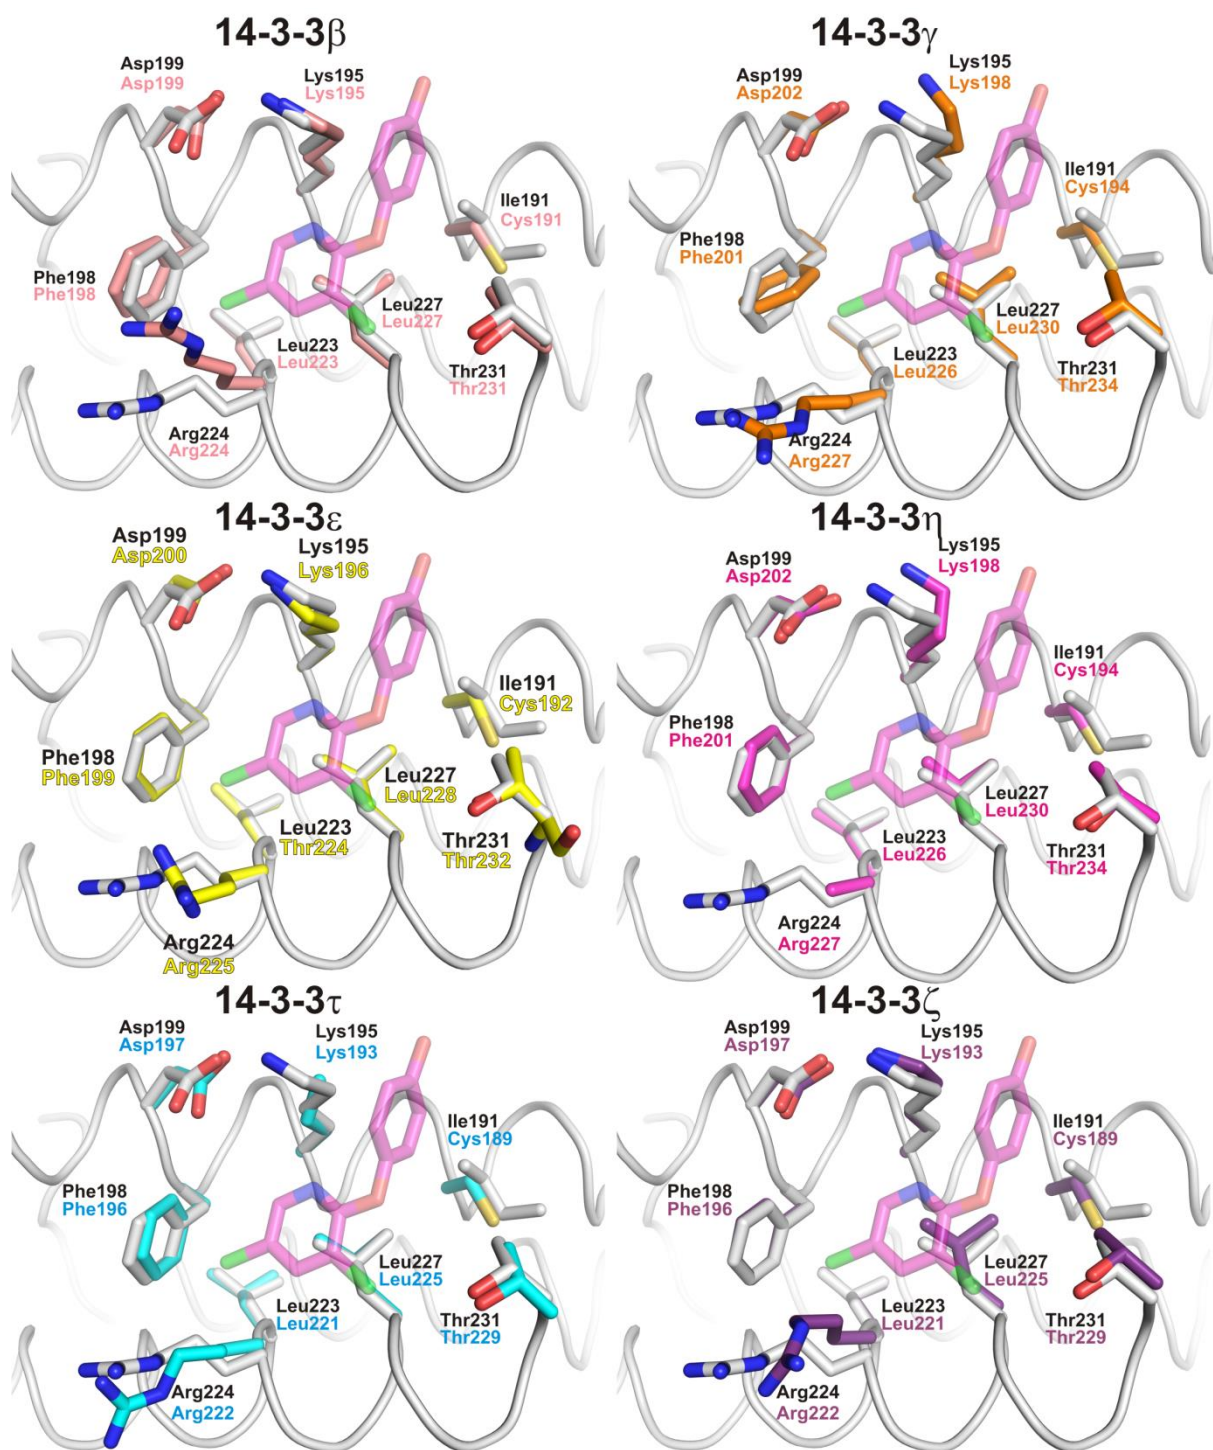

**Figure S5: Structural alignments of the NV2 and NV3 binding pocket among the seven human 14-3-3 isoforms.** Structures with the following PDB IDs were used for the depicted alignments: 14-3-3 $\beta$  (4GNT), 14-3-3 $\gamma$  (4J6S), 14-3-3 $\epsilon$  (3UBW), 14-3-3 $\eta$  (2C74), 14-3-3 $\tau$  (2BTP), 14-3-3 $\zeta$  (4WRQ).
